# Supplementary material for: Targeting and structural engineering of light-responsive nanoprobes for hierarchical therapy: construction, optimization, and applications in cancer stem cells
Source: Royal Society of Chemistry journal article supplement (doi:10.1039/d4tb02508c), 2025-01-01
Supplement: d4tb02508c1.pdf [file d4tb02508c1.pdf]

## Electronic Supplementary Information

### Targeting and Structural Engineering of light-responsive nanoprobe for Hierarchical Therapy: Construction, Optimization, and Applications in Cancer Stem Cells

Jiangluqi Song,<sup>\*a</sup> Jinhang Hu,<sup>\*b</sup> Huan Li,<sup>a</sup> Pei Xiang,<sup>a</sup> Zhiqiang Wang,<sup>a</sup> Xiaofang Wang,<sup>a</sup> Shuxia Qi,<sup>a</sup> Mingya Yang<sup>\*c</sup> and Lixin Zhu<sup>c</sup>

<sup>a</sup> School of Physics, Xidian University, Xi'an 710071, China. Email: jlqsong@xidian.edu.cn

Co-construction Collaborative Innovation Center for Chinese Medicine Resources Industrialization by <sup>a</sup>

<sup>b</sup> Shaanxi & Education Ministry, State Key Laboratory of Research & Development of Characteristic Qin Medicine Resources (Cultivation), Shaanxi University of Chinese Medicine, Xianyang 712046, China. Email: hujinhanghi@126.com

<sup>c</sup> Department of Hematology, First Affiliated Hospital of Anhui Medical University, Hefei 230022, China. Email: mingya-yang@outlook.com

## ***In vitro* experiment**

### **Cell Culture**

Human colon cancer cell line (SW-620) was obtained from the ATCC, and colon cancer stem cells (CCSCs) were sorted from SW-620 cells using CD133 (Prominin-1) monoclonal antibody as a marker. High glucose Dulbecco's modified Eagle's medium (DMEM), 3-(4,5-dimethylthiazol-2-yl)-2,5-diphenyltetrazolium bromide (MTT), penicillin–streptomycin, fetal bovine serum, phosphate-buffered solution (PBS), and streptomycin were purchased from commercial sources.

Human colorectal cancer cells (SW620) were cultured in high-glucose Dulbecco's modified Eagle's medium (DMEM), supplemented with 10% fetal bovine serum (FBS), 100 U/mL penicillin, and 0.1 mg/mL streptomycin. The cells were maintained at 37 °C in a 5% CO<sub>2</sub> humidified incubator.

CCSCs were cultured in a serum-free medium in a low-adherence culture flask supplemented with epidermal growth factor and leukemia inhibitory factor. The culture medium was further enriched with a 1% antibiotic-antimycotic formulation. Incubation of cells took place in a 5% CO<sub>2</sub> incubator at 37 °C.

### **Cell internalization mechanism**

To investigate the cellular uptake mechanism of Hb-AHSNs nanoparticles in SW620 cells, cells were seeded in a 96-well plate at a density of  $5 \times 10^3$  cells per well. After a 24-hour incubation in serum-free DMEM, cells were treated for 2 hours at 4 °C or in the presence of specific inhibitors, including 20.2 µg/mL of genistein, 8 µg/mL amiloride, 6.5 mg/mL M-β-CD, 3 mM of chlorpromazine, 8 mM of NaN<sub>3</sub>, 20 µg/mL dextran sulfate, respectively. Subsequently, 10 µg/mL of Hb-AHSNs nanoparticles were added to each group and incubated for 2 hours. Cellular fluorescence intensity was assessed using flow cytometry.

### **PTT/PDT treatment**

Cells were seeded in 6-well culture plates and incubated for 24 hours. Subsequently, the cells were treated with different concentrations of nanoparticles in the dark for 24 hours (unless stated otherwise) and then washed with PBS. Before photodynamic therapy (PDT), the complete culture medium was fully replaced. Cells were treated

with or without laser irradiation (808 nm for PTT, 590 nm for PDT, 0.5 W/cm<sup>2</sup>) for different time.

To investigate the synergistic effect of PDT-PTT-photothermal combination cancer therapy, typically, Hb-AHSNs-Ab (50 µg/mL) were added to the cells and incubated for 2 h. Then, cells were irradiated by 808 nm and 590 nm laser (0.5 W/cm<sup>2</sup>) for 5 min sequentially. The cells were further incubated for 24 h, and viability was measured using CCK-8 assay and expressed relative to the non-treated, laser irradiated cells. The single PDT effect of AHSNs or Hb-AHSNs was evaluated by comparison with the results of treatment with an equivalent amount of Hyp-TAT. For quantitative analysis, synergistic factors were calculated by dividing the predicted additive viability by the viability of combination therapy. Synergistic factor >1 indicates synergistically enhanced cell killing by the combination treatment compared to the sequential treatment of the individual modalities.<sup>1</sup>

### **Cytotoxicity Assay**

Cells were seeded in 96-well culture plates and treated according to the aforementioned protocol. MTT solution (20 µL, 5 mg/mL) was added to each well, and the cells were incubated for 4 hours in the dark. Subsequently, the formazan crystals were dissolved with 150 µL of DMSO. Absorbance was measured at 490 nm using a microplate reader. The results were expressed as percentages relative to the absorbance of the untreated control. The half inhibition concentration (IC<sub>50</sub>) was determined based on the relative survival curve.

### **Reactive oxygen species measurement**

The evaluation of intracellular oxidative stress was conducted using the Reactive Oxygen Species Assay Kit, incorporating DCFH-DA. Following nanoparticles incubation, cells were washed twice with PBS. Subsequently, 1 mL of DCFH-DA solution (10 µM) was added, and the cells were incubated at 37 °C for 20 min. The supernatant was aspirated, and the cells were washed another two times with PBS. The cellular response was captured using a fluorescence microscope.

### **Immunofluorescence**

Cells treated with PDT or PTT were fixed using immunostaining fix solution (for 20

min, followed by permeabilization with immunostaining permeabilization buffer for 10 min. Subsequently, cells were blocked with 3% BSA in PBS for 1.5 hours at room temperature. For immunofluorescence analysis, CDC25A and CDK2 primary antibodies were applied and allowed to incubate overnight at 4 °C. FITC-conjugated secondary antibody was used to incubate the cells for 45 min at room temperature. The nuclei were stained with Hoechst 33342 for 10 min. The cells underwent three washes and were subsequently observed and observed using a fluorescence microscope.

### **Combination therapy for CCSCs-related tumorsphere formation**

Primary tumor (SW620) cells were dissociated into single cells and seeded in ultralow attachment 6-well plates at a density of 2000 cells/well. Subsequently, Hb-AHSNs or Hb-AHSNs-Ab were added to the cells (15 µg/mL), and incubate for 24 hours, followed by PDT-PTT treatment administered once every six hours, totaling three treatments. Stem cell frequency was assessed for each group. The cells were then cultured for 10 days, and tumorspheres larger than 50 µm in diameter were counted. The stem cell frequency of each group was reassessed.

### **Statistical Analysis**

The data were expressed as means ± standard deviation (S.D.), and each experiment was performed in triplicate. Statistical analysis was conducted using an unpaired Student's t-test. A significance level of  $P < 0.05$  was considered statistically significant. The significance levels were denoted as follows: \* $P < 0.05$ , \*\* $P < 0.01$ , \*\*\* $P < 0.001$ , and "ns" indicated no significant differences from the control.

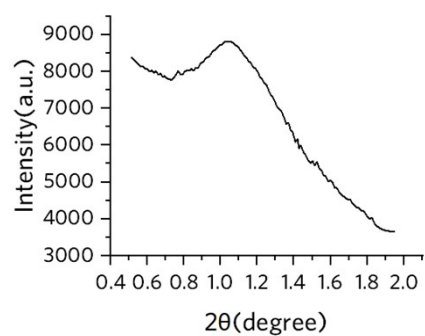

**Fig. S1 (a)** Small-angle x-ray scattering result of the obtained SNs.

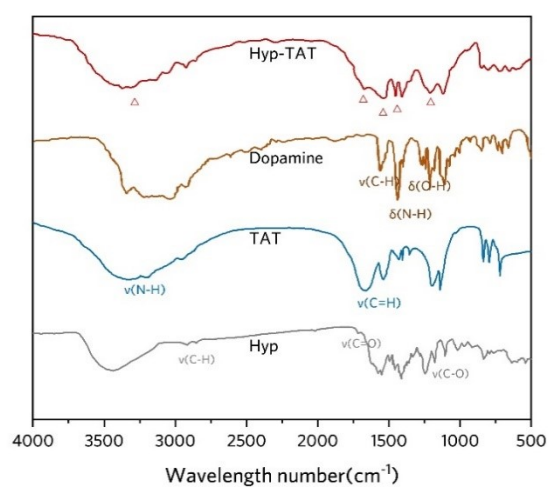

**Fig. S2** FTIR spectra of hypericin, TAT, dopamine and Hyp-TAT, respectively.

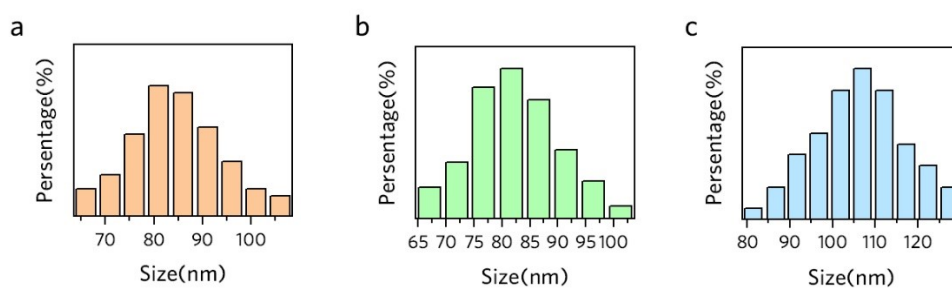

**Fig. S3** Histograms of size distribution of SNs (a), HSNs (b) and AHSNs (c), respectively.

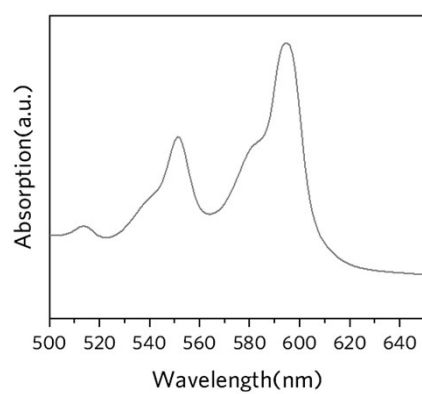

**Fig. S4** Absorption spectrum of hypericin.

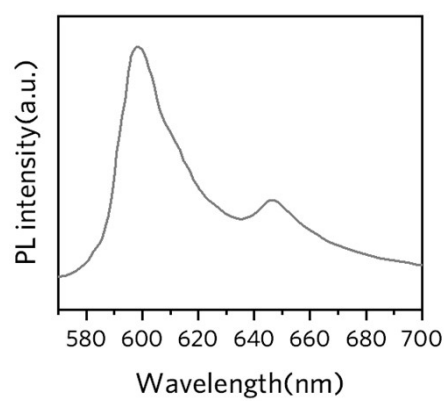

**Fig. S5** PL spectrum of hypericin.

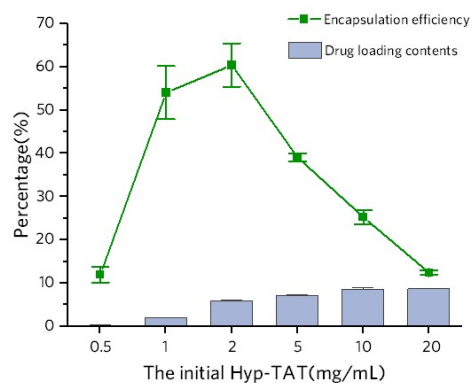

**Fig. S6** Encapsulation efficiency and drug loading contents of SNs under different initial concentrations of Hyp-TAT.

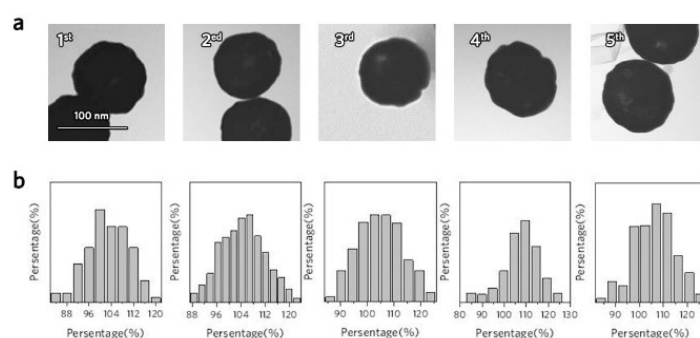

**Fig. S7** TEM images (a) and corresponding histograms (b) of AHSNs obtained after each heating and cooling cycle. The average diameters are 105.8, 104.6, 104.8, 108 and 106.2 nm, respectively.

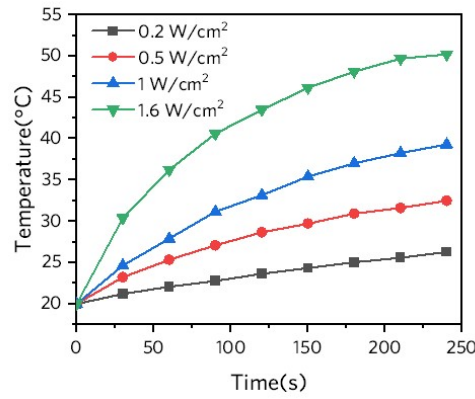

**Fig. S8** Photothermal-heating curves of AHSNs ( $10 \mu\text{g mL}^{-1}$ ) under NIR laser illumination at various laser power densities.

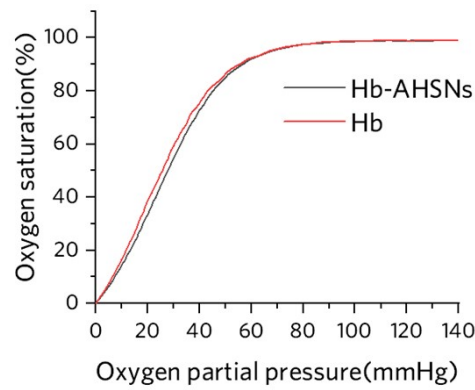

**Fig. S9** Oxygen dissociation curves (b) of Hb and Hb-AHSNs.

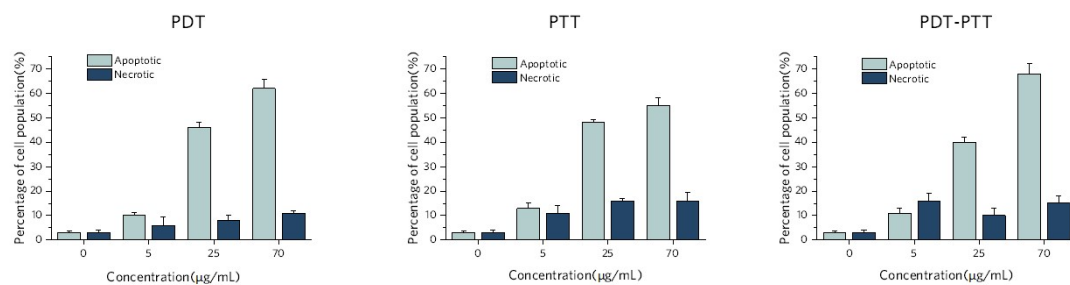

**Fig. S10** In SW620 cells, the populations of apoptotic cells and necrotic cells were evaluated as the percentage of total cells for 12 h incubation.

**Table S1** The variables and levels used for RSM.

| Factors                                   | Level |      |     |
|-------------------------------------------|-------|------|-----|
|                                           | -1    | 0    | 1   |
| NPs concentration<br>( $\mu\text{g/mL}$ ) | 20    | 70   | 120 |
| PTT dose<br>( $\text{J/cm}^2$ )           | 1     | 6.5  | 12  |
| PDT dose<br>( $\text{J/cm}^2$ )           | 0.5   | 2.75 | 5   |

**Table S2** The studied variables levels in each run with experimental response based on CCD method.

| No. | NPs concentration<br>( $\mu\text{g/mL}$ ) | PTT dose<br>( $\text{J/cm}^2$ ) | PDT dose<br>( $\text{J/cm}^2$ ) | SF (experimental) |
|-----|-------------------------------------------|---------------------------------|---------------------------------|-------------------|
| 1   | 20                                        | 1                               | 0.5                             | 1.99              |
| 2   | 20                                        | 1                               | 5                               | 3.24              |
| 3   | 20                                        | 6.5                             | 2.75                            | 4.36              |
| 4   | 20                                        | 12                              | 0.5                             | 2.43              |
| 5   | 20                                        | 12                              | 5                               | 2.55              |
| 6   | 70                                        | 1                               | 2.75                            | 3.45              |
| 7   | 70                                        | 6.5                             | 0.5                             | 1.46              |
| 8   | 70                                        | 6.5                             | 5                               | 3.90              |
| 9   | 70                                        | 6.5                             | 2.75                            | 6.30              |
| 10  | 70                                        | 12                              | 2.75                            | 2.56              |
| 11  | 120                                       | 1                               | 0.5                             | 1.18              |
| 12  | 120                                       | 1                               | 5                               | 2.175             |
| 13  | 120                                       | 6.5                             | 2.75                            | 3.15              |
| 14  | 120                                       | 12                              | 0.5                             | 1.515             |
| 15  | 120                                       | 12                              | 5                               | 1.61              |

**Table S3.** Variance analysis of the model equation.

| Parameter | Coefficient Estimate | F-value | p-value                |
|-----------|----------------------|---------|------------------------|
| $\beta_0$ | 0.2457               | 0.292   | 0.591                  |
| $\beta_1$ | 0.0515               | 44.212  | $2.22 \times 10^{-9}$  |
| $\beta_2$ | 0.1309               | 2.5     | 0.117                  |
| $\beta_3$ | 0.9813               | 13.319  | 0.0004                 |
| $\beta_4$ | -0.00041             | 55.675  | $5.17 \times 10^{-11}$ |
| $\beta_5$ | -0.01145             | 4.145   | 0.045                  |
| $\beta_6$ | -0.1096              | 7.229   | 0.0085                 |
| $\beta_7$ | -0.00027             | 0.628   | 0.43                   |
| $\beta_8$ | 0.000208             | 0.05    | 0.823                  |
| $\beta_9$ | 0.0396               | 16.842  | $8.91 \times 10^{-5}$  |

## References

- 1 J. Nam, W.-G. La, S. Hwang, Y. S. Ha, N. Park, N. Won, S. Jung, S. H. Bhang, Y.-J. Ma, Y.-M. Cho, M. Jin, J. Han, J.-Y. Shin, E. K. Wang, S. G. Kim, S.-H. Cho, J. Yoo, B.-S. Kim and S. Kim, *ACS Nano*, 2013, **7**, 3388-3402.
